# Supplementary material
Source: HighWire-hosted journal article supplement (https://jnm.snmjournals.org/highwire/filestream/95399/field_highwire_adjunct_files/0/220517_Supplemental_Data.pdf)
Supplement: 220517_Supplemental_Data.pdf [file 220517_Supplemental_Data.pdf]

1 1. Synthesis and characterization of the radiolabeling precursor for <sup>11</sup>C-EKAP and  
2 EKAP

3

4 1.1 General Information

5 All reagents and solvents were obtained from commercial sources (Sigma-Aldrich,  
6 VWR and Fisher Scientific) and used without further purification unless noted otherwise.  
7 Proton and carbon nuclear magnetic resonance (<sup>1</sup>H and <sup>13</sup>C NMR) spectra were recorded  
8 on an Agilent™ 400 MHz or 600 MHz NMR spectrometer. Chemical shifts are reported  
9 in parts per million, with the solvent resonance as the internal standard (CDCl<sub>3</sub>: 7.26 ppm;  
10 DMSO-*d*<sub>6</sub>: 2.49 ppm in <sup>1</sup>H NMR and CDCl<sub>3</sub>: 77.0 ppm; DMSO-*d*<sub>6</sub>: 39.7 ppm in <sup>13</sup>C NMR).  
11 Multiplicities are indicated as s (singlet), d (doublet), t (triplet), q (quartet), quint (quintet),  
12 m (multiplet); coupling constants *J* are given in hertz (Hz). Melting point was determined  
13 on an Electrothermal™ Mel-Temp instrument. High resolution mass spectrometry was run  
14 on a 9.4T Bruker Qe FT-ICR MS system. Chiral-HPLC was performed with a Varian  
15 Prostar system including a Prostar 210 pump and a Prostar 325 UV detector at 254 nm  
16 wavelength. All chemicals used were of ≥ 95% purity, based on HPLC, LC-MS, or NMR.  
17

18 1.2 Synthesis and characterization of the radiolabeling precursor ((*S*)-**11**)

19 Benzylglycine (**1**) was protected with Boc-anhydride, followed by a coupling  
20 amidation with serine methyl ester (**3**) to afford compound **4**. It was treated with SOCl<sub>2</sub>  
21 and cyclized to produce the piperazinedione (**5**), which was then reduced to piperazine (**6**)  
22 using LiAlH<sub>4</sub>. Coupling of compound **6** and dichlorophenylacetic acid (**7**) led to compound

23 **8**, which was oxidized through Swern oxidation to provide aldehyde (**9**). Compound 9  
24 inevitably racemized when triethylamine was used in the oxidation reaction. The racemic  
25 aldehyde then underwent a reductive amination with diethylamine, followed by cleavage  
26 of the benzyl protecting group to afford racemic compound **11**.

27 *N*-Benzyl-*N*-(*tert*-butoxycarbonyl)glycine (**2**): To a suspension of *N*-benzylglycine  
28 hydrochloride (**1**, 10.17 g, 50.43 mmol) and (Boc)<sub>2</sub>O (13.58 g, 60.36 mmol) in deionized  
29 (DI) water (150 mL) was added triethylamine (TEA, 14.1 mL, 101.09 mmol). The mixture  
30 was stirred at room temperature for 3 h, and quenched with 12 N HCl (3.70 mL, 151.29  
31 mmol) until the pH of the mixture reached 2. The mixture was extracted with EtOAc (100  
32 mL × 3). The combined organic phase was dried over Na<sub>2</sub>SO<sub>4</sub> and concentrated *in vacuo*  
33 to afford compound **2** as a white solid (11.1 g, 83%) in a ~1:1 mixture of two rotamers,  
34 which was used in the next step of synthesis without further purification. <sup>1</sup>H-NMR (CDCl<sub>3</sub>,  
35 400 MHz): Rotamer A: δ 1.48 (s, 9H), 3.82 (s, 2H), 4.55 (rotamer B, s, 1H), 4.51 (rotamer  
36 A, s, 1H), 7.17-7.38 (m, 5H), 9.30 (br s, 1H). M.P. 103-104 °C.

37 *Methyl N*-benzyl-*N*-(*tert*-butoxycarbonyl)glycyl-*D*-serinate (**4**): To a solution of  
38 compound **2** (11.10 g, 41.84 mmol) in anhydrous CH<sub>2</sub>Cl<sub>2</sub> (50 mL) was added 1,1'-  
39 carbonyldiimidazole (CDI, 6.78 g, 41.84 mmol) at room temperature under argon. The  
40 solution was stirred at room temperature for 1 h and then added slowly via a cannula to a  
41 pre-cooled (0 °C) solution of *D*-serine methyl ester hydrochloride (**3**, 6.51 g, 41.84 mmol)  
42 and TEA (5.8 mL, 41.84 mmol) in anhydrous CH<sub>2</sub>Cl<sub>2</sub> (30 mL). The mixture was stirred at  
43 room temperature for 16 h and washed with saturated NaHCO<sub>3</sub> solution (80 mL × 3). The  
44 organic phase was dried over Na<sub>2</sub>SO<sub>4</sub> and concentrated *in vacuo*. The crude product was

45 purified on a silica gel column eluting with 30-60% acetone/hexanes to afford compound  
46 **4** as a white solid (6.1 g, 48%). <sup>1</sup>H-NMR (CDCl<sub>3</sub>, 400 MHz): δ 1.50 (s, 9H), 3.78 (s, 3H),  
47 3.82-3.94 (m, 2H), 4.45 (br s, 1H), 4.54-4.70 (m, 2H), 7.19-7.39 (m, 5H). M.P. 105-107  
48 °C.

49 (*R*)-1-Benzyl-3-(hydroxymethyl)piperazine-2,5-dione (**5**): To a solution of  
50 compound **4** (6.1 g, 16.6 mmol) in anhydrous MeOH (60 mL) under argon was dropwise  
51 added SOCl<sub>2</sub> (6.1 mL, 83.2 mmol). The mixture was stirred at room temperature for 4 h  
52 and concentrated *in vacuo*. The resulting solid was washed with Et<sub>2</sub>O (18 mL × 2), re-  
53 dissolved in a mixture of MeOH and NH<sub>4</sub>OH (1:1, v/v, 60 mL) and stirred for 16 h. The  
54 mixture was concentrated *in vacuo*, and the crude product was purified on a silica gel  
55 column eluting with 10% THF/hexanes to afford compound **5** as a white solid (4.0 g, 80%),  
56 <sup>1</sup>H-NMR (CD<sub>3</sub>OD, 400 MHz): δ 3.69-3.78 (m, 2H), 4.05 (s, 2H), 3.99-4.08 (m, 1H), 4.59  
57 (d, *J* = 14.89 Hz, 1H), 4.77 (d, *J* = 14.87 Hz, 1H), 7.21-7.38 (m, 5H). M.P. 183-186 °C.

58 (*S*)-(4-Benzylpiperazin-2-yl)methanol (**6**): To a solution of compound **5** (4.0 g, 17.1  
59 mmol) in anhydrous THF (60 mL) under argon was dropwise added a solution of LiAlH<sub>4</sub>  
60 (14.2 mL, 2.4 M in THF). The mixture was heated to reflux for 2 h, cooled to room  
61 temperature and quenched sequentially with DI water (1.3 mL), NaOH solution (3.9 mL,  
62 2 M), and DI water (1.3 mL). The suspension was filtered, and the filtrate was concentrated  
63 *in vacuo*. The crude product was purified on a silica gel column eluting with  
64 CH<sub>2</sub>Cl<sub>2</sub>/MeOH/NH<sub>4</sub>OH (200:10:1) to give compound **6** as yellow oil (2.5 g, 71%). <sup>1</sup>H-  
65 NMR (CDCl<sub>3</sub>, 400 MHz): δ 1.88 (t, *J* = 10.28 Hz, 1H), 2.09 (m, 1H), 2.62 (br s, 1H), 2.71

66 (d,  $J = 10.99$  Hz, 2H), 2.85-2.95 (m, 2H), 2.97-3.02 (m, 2H), 3.49 (d,  $J = 5.55$  Hz, 2H),  
67 3.52-3.58 (m, 2H), 7.23-7.27 (m, 1H), 7.34 (d,  $J = 3.90$  Hz, 2H), 7.30-7.38 (m, 2H).

68 *(S)*-1-(4-Benzyl-2-(hydroxymethyl)piperazin-1-yl)-2-(3,4-dichlorophenyl)ethan-1-  
69 *one* (**8**): To a solution of compound **7** (1.95 g, 9.5 mmol) in anhydrous  $\text{CH}_2\text{Cl}_2$  (20 mL)  
70 under argon was added CDI (1.54 g, 9.5 mmol). The solution was stirred at room  
71 temperature for 1 h and added slowly via a cannula to a pre-cooled (0 °C) solution of  
72 compound **6** (1.96 g, 9.5 mmol) in anhydrous  $\text{CH}_2\text{Cl}_2$  (10 mL). The reaction mixture was  
73 stirred at room temperature for 16 h and washed with saturated  $\text{NaHCO}_3$  solution (30 mL  
74  $\times 3$ ). The organic phase was dried over  $\text{Na}_2\text{SO}_4$  and concentrated *in vacuo*. The crude  
75 product was purified on a silica gel column eluting with 40-70% EtOAc/hexanes to afford  
76 compound **8** as a white solid (1.77 g, 37%).  $^1\text{H-NMR}$  ( $\text{CDCl}_3$ , 400 MHz):  $\delta$  1.93-2.29 (m,  
77 2H), 2.75-3.10, (m, 2H), 3.33-3.67 (m, 4H), 3.67 (rotamer B, s, 1.2H), 3.72 (rotamer A, s,  
78 0.8H), 3.88 (br s, 1H), 3.75-4.10 (m, 2H), 4.37-4.45 (rotamer A, m, 0.4H), 4.56-4.62  
79 (rotamer B, m, 0.6H), 7.07 (dd,  $J = 2.15, 8.28$  Hz, 1H), 7.24-7.42 (m, 7H). M.P. 144-145  
80 °C.

81 *4-Benzyl-1-(2-(3,4-dichlorophenyl)acetyl)piperazine-2-carbaldehyde* (**9**): To a  
82 solution of oxalyl chloride (0.46 mL, 5.39 mmol) in anhydrous  $\text{CH}_2\text{Cl}_2$  (30 mL) under  
83 argon and cooled to -78 °C was dropwise added a solution of DMSO (0.64 mL, 8.98 mmol)  
84 in anhydrous  $\text{CH}_2\text{Cl}_2$  (2 mL), followed by a solution of compound **8** (1.77 g, 4.49 mmol)  
85 in  $\text{CH}_2\text{Cl}_2$  (5 mL). TEA (2.5 mL, 17.96 mmol) was added after 30 min, and the mixture  
86 was stirred for another 15 min, then slowly warmed to 0 °C. The reaction was quenched  
87 with DI water and extracted with  $\text{CH}_2\text{Cl}_2$  (20 mL  $\times 2$ ). The combined organic phase was

88 dried over Na<sub>2</sub>SO<sub>4</sub> and concentrated *in vacuo*. The crude product was purified on a silica  
89 gel column eluting with 30-50% EtOAc/hexanes to afford compound **9** as a yellow solid  
90 (0.9 g, 51 %). <sup>1</sup>H-NMR (CDCl<sub>3</sub>, 400 MHz): δ 2.05 (td, *J* = 3.42, 11.71 Hz, 1H), 2.28 (dd,  
91 *J* = 4.27, 12.04 Hz, 1H), 2.76 (d, *J* = 11.80 Hz, 1H), 3.0 (d, 1H), 3.33 (td, *J* = 3.52, 12.47  
92 Hz, 1H), 3.43 (dt, *J* = 2.01, 11.97 Hz, 1H), 3.45-3.61 (3H, m), 3.76 (s, 2H), 5.11-5.15 (m,  
93 1H), 7.13 (dd, *J* = 1.83, 8.26 Hz, 1H), 7.20-7.43 (m, 7H), 9.45 (s, 1H). M.P. 144-145 °C.

94 *1-(4-Benzyl-2-((diethylamino)methyl)piperazin-1-yl)-2-(3,4-*  
95 *dichlorophenyl)ethan-1-one (10)*: To a solution of compound **9** (0.33 g, 0.84 mmol) in  
96 anhydrous 1,2-dichloroethane (13 mL) under argon were added 3 Å molecular sieves (0.30  
97 g) and diethylamine (DEA, 0.25 g, 2.52 mmol), followed by AcOH (0.14 mL, 2.52 mmol).  
98 After stirring for 30 min, NaBH(OAc)<sub>3</sub> (0.53 g, 2.52 mmol) was added in three portions  
99 and the reaction mixture was kept stirring for 16 h. The reaction was quenched with  
100 saturated NaHCO<sub>3</sub> solution until the pH reached 8.0, then extracted with CH<sub>2</sub>Cl<sub>2</sub> (10 mL ×  
101 3). The combined organic phase was dried over Na<sub>2</sub>SO<sub>4</sub> and concentrated *in vacuo*. The  
102 crude product was purified on a silica gel column eluting with 20-30% MeOH/CH<sub>2</sub>Cl<sub>2</sub> to  
103 afford compound **10** as pale yellow oil (0.34 g, 90%). <sup>1</sup>H-NMR (CDCl<sub>3</sub>, 400 MHz): δ 0.90  
104 (t, *J* = 7.06 Hz, 6H), 1.77-2.02 (m, 2H), 2.40 (q, *J* = 7.08 Hz, 4H), 2.45-3.00 (m, 5H), 3.30-  
105 3.45 (m, 3H), 3.58 (s, 1H), 3.67 (d, *J* = 2.96 Hz, 1H), 4.34-4.36 (rotamer A, m, 0.5H), 4.53-  
106 4.55 (rotamer B, m, 0.5H), 7.01 (dd, *J* = 8.32, 13.95 Hz, 1H), 7.15-7.25 (m, 5H), 7.27-7.32  
107 (m, 2H).

108 *2-(3,4-Dichlorophenyl)-1-(2-((diethylamino)methyl)piperazin-1-yl)ethan-1-one*  
109 (**11**): Compound **10** (0.42 g, 0.90 mmol) was dissolved in a mixture of THF and DI water

110 (1:1, v/v, 8 mL) and degassed with argon for 10 min. To this solution were added 12 N HCl  
111 (0.8 mL) and 5% Pd/C powder (0.60 g). The resulting suspension was stirred under an  
112 atmosphere of hydrogen at room temperature for 3 h. The mixture was filtered through  
113 Celite, and the filtrate was concentrated *in vacuo*. The residue was diluted with DI water,  
114 basified with 2 M Na<sub>2</sub>CO<sub>3</sub> solution, and extracted with CH<sub>2</sub>Cl<sub>2</sub> (5 mL × 3). The combined  
115 organic phase was dried over Na<sub>2</sub>SO<sub>4</sub> and concentrated *in vacuo*. The crude product was  
116 purified on a silica gel column eluting with CH<sub>2</sub>Cl<sub>2</sub>/MeOH/NH<sub>4</sub>OH (200-100:10:1) to  
117 afford the racemic compound **11** as colorless oil (0.20 g, 76%). <sup>1</sup>H-NMR (CDCl<sub>3</sub>, 400  
118 MHz): δ 0.94 (t, 6H), 2.46 (q, *J* = 6.91 Hz, 2H), 2.47-3.16 (m, 9H), 3.61 (s, 1H), 3.69 (s,  
119 1H), 3.38-3.72 (m, 1H), 4.36 (rotamer A, m, 0.5H), 4.56 (rotamer B, m, 0.5H), 7.01 (dd, *J*  
120 = 7.96, 17.43 Hz, 1H), 7.27 (s, 1H), 7.31 (d, *J* = 8.15 Hz, 1H); <sup>13</sup>C-NMR: (CDCl<sub>3</sub>, 151  
121 MHz): δ 169.35, 168.51, 135.99, 135.49, 132.36, 130.89, 130.77, 130.32, 130.28, 128.56,  
122 128.52, 128.45, 128.38, 126.55, 53.32, 52.92, 51.09, 47.69 (2C), 47.49, 47.35 (2C), 47.26,  
123 46.16, 46.14, 45.98, 43.13, 39.89, 39.29, 38.24, 12.01(2C), 11.83 (2C); HRMS: calculated  
124 for C<sub>17</sub>H<sub>25</sub>Cl<sub>2</sub>N<sub>3</sub>O ([M + H]<sup>+</sup>), 358.1447; found, 358.1446.

125 (*R*)- and (*S*)-2-(3,4-Dichlorophenyl)-1-(2-((diethylamino)methyl)piperazin-1-  
126 yl)ethan-1-one ((*R*)-**11** and (*S*)-**11**): Resolution of the two enantiomers was conducted on  
127 a Chiralcel OD semi-preparative column (10 μm, 10 × 250 mm). Compound **11** (0.20 g,  
128 0.56 mmol) was dissolved in EtOH (2.0 mL) and 50 μL of the solution was injected in each  
129 run. Mobile phase: 40/60 *i*PrOH/hexanes, flow rate: 4 mL/min, the first compound eluting  
130 out from the column was (*S*)-**11**, with retention time of 5.72 min, while the second

131 compound was (*R*)-**11**, with retention time of 11.55 min. Both enantiomers were isolated  
132 in > 95% enantiomeric excess (*ee*).

133

134 1.3 Synthesis and characterization of EKAP (**12**) and its fumarate salt (**13**)

135 *Methyl (R)-4-(2-(3,4-dichlorophenyl)acetyl)-3-((diethylamino)methyl)piperazine-*  
136 *l-carboxylate (12)*: To a solution of compound (*S*)-**11** (0.13 g, 0.36 mmol) in anhydrous  
137 CH<sub>2</sub>Cl<sub>2</sub> (2.5 mL) under argon and cooled to 0 °C was added methyl chloroformate (0.14  
138 mL, 1.80 mmol), followed by TEA (0.10 mL, 0.72 mmol). The reaction mixture was  
139 warmed to room temperature and stirred for 16 h, then quenched with DI water and  
140 extracted with CH<sub>2</sub>Cl<sub>2</sub> (2 mL × 2). The combined organic phase was dried over Na<sub>2</sub>SO<sub>4</sub>  
141 and concentrated *in vacuo*. The crude product was purified on a silica gel column eluting  
142 with 2-5% MeOH/CH<sub>2</sub>Cl<sub>2</sub> to afford compound **12** as colorless oil (0.12 g, 80%). <sup>1</sup>H-NMR  
143 (CDCl<sub>3</sub>, 400 MHz): δ 7.36-7.26 (m, 2H), 7.07-6.97 (m, 1H), 4.64-4.54 (m, 1H), 4.46-4.36  
144 (m, 1H), 4.13 (d, *J* = 13.38 Hz, 1H), 4.09 (d, *J* = 13.19 Hz, 1H), 3.74-3.64 (m, 3H), 3.65  
145 (s, 3H), 3.53-3.43 (m, 1H), 2.86 (dd, *J* = 4.02 13.35 Hz, 1H), 2.78-2.68 (m, 2H), 2.51-2.41  
146 (m, 4H), 0.91 (t, *J* = 6.94 Hz, 6H).

147 *Methyl (R)- and (S)-4-(2-(3,4-dichlorophenyl)acetyl)-3-((diethylamino)methyl)*  
148 *piperazine-l-carboxylate fumarate (13)*: To a solution of compound **12** (0.12 g, 0.29 mmol)  
149 in Et<sub>2</sub>O (0.6 mL) was added a solution of fumaric acid (0.035 g, 0.30 mmol) in MeOH  
150 (0.07 mL). The white precipitate was collected through filtration and recrystallized in Et<sub>2</sub>O  
151 to afford compound **13** as a white solid (0.095 g, 61%). <sup>1</sup>H-NMR (DMSO-*d*<sub>6</sub>, 400 MHz):  
152 δ 0.89 (t, *J* = 6.82 Hz, 6H), 2.20-2.35 (m, 1H), 2.38-2.46 (m, 4H overlap with H<sub>2</sub>O peak in

153 DMSO), 2.70-2.79 (m, 1H), 2.81-2.97 (m, 2H), 3.58 (s, 3H), 3.67-3.95 (m, 4H), 3.95-4.05  
154 (m, 1H), 4.19 (m, 1H), 4.44 (m, 1H), 6.59 (s, 2H), 7.19 (d,  $J = 8.33$  Hz, 1H), 7.47 (s, 1H),  
155 7.54 (d,  $J = 8.24$  Hz, 1H), 13.02 (s, 2H).  $^{13}\text{C}$ -NMR ( $\text{CD}_3\text{OD}$ , 75 MHz):  $\delta$  173.08 (2C),  
156 170.57, 157.78, 136.93, 136.02 (2C), 133.22, 132.72, 131.92, 131.54, 130.59, 53.68 (2C),  
157 52.64, 47.00, 44.60, 42.32 (2C), 40.06 (2C), 8.95 (2C). M.P. 137 °C.  $[\alpha]^{22}_{\text{D}} = -32.32^\circ$  ( $c =$   
158 0.5,  $\text{H}_2\text{O}$ ). Compound **13** was assigned the *R*-configuration based on the result of negative  
159 rotation, in reference to the lead compound GR103545 (*R*-enantiomer), which has an  
160 optical rotation of  $[\alpha]^{22}_{\text{D}} = -25.60^\circ$  ( $c = 0.5$ ,  $\text{H}_2\text{O}$ ). HRMS: calculated for  
161  $\text{C}_{19}\text{H}_{27}\text{Cl}_2\text{N}_3\text{O}_3 \cdot \text{C}_4\text{H}_4\text{O}_4$  ( $[\text{M} + \text{H}]^+$ ), 416.1502; found, 416.1504.

162

#### 163 1.4 Synthesis and characterization of (*S*)-enantiomer (**14**) and its fumarate salt (**15**)

164 *Methyl (S)-4-(2-(3,4-dichlorophenyl)acetyl)-3-((diethylamino)methyl)piperazine-*  
165 *l-carboxylate (14)*: Compound **14** was prepared in procedures similar to those described  
166 above for compound **12** using (*R*)-**11** as the starting material. Yield: 80%.  $^1\text{H}$  NMR ( $\text{CDCl}_3$ ,  
167 400 MHz):  $\delta$  0.93 (t,  $J = 6.91$  Hz, 6H), 2.42-2.58 (m, 4H), 2.76 (m, 2H), 2.88 (dd,  $J = 3.72$ ,  
168 13.37 Hz, 1H), 3.45-3.58 (m, 1H), 3.65 (s, 3H), 3.62-3.75 (m, 3H), 4.11 (d,  $J = 13.66$  Hz,  
169 1H), 4.16 (d,  $J = 13.45$  Hz, 1H), 4.43 (m, 1H), 4.61 (m, 1H), 7.04 (m, 1H), 7.32 (m, 2H).

170 *Methyl (S)-4-(2-(3,4-dichlorophenyl)acetyl)-3-((diethylamino)methyl)piperazine-*  
171 *l-carboxylate fumarate (15)*: Compound **15** was prepared in procedures similar to those  
172 described above for compound **13**. Yield: 61%.  $^1\text{H}$  NMR ( $\text{MeOD}$ , 400 MHz):  $\delta$  1.22 (t,  $J$   
173 = 7.21 Hz, 6H), 3.05-3.23 (m, 6H), 3.72 (s, 3H), 3.75-4.09 (m, 8H), 4.89 (m, 1H overlap



174 with H<sub>2</sub>O peak in MeOD), 6.70 (s, 2H), 7.19 (dd,  $J = 1.98, 8.32$  Hz, 1H), 7.46 (d,  $J = 1.98$   
175 Hz, 1H), 7.48 (d,  $J = 8.29$  Hz, 1H).  $[\alpha]^{22}_{\text{D}} = 32.00^{\circ}$  ( $c = 0.05$ , H<sub>2</sub>O).

176

## 177 2. Radiosynthesis of <sup>11</sup>C-EKAP

178

### 179 2.1 General information

180 The semi-preparative HPLC system includes a Shimadzu™ LC-20A pump, a  
181 Knauer K200 UV detector, and a Bioscan  $\gamma$ -flow detector. The analytical HPLC system  
182 include a Shimadzu™ LC-20A pump, a Shimadzu™ SPD-M20A PDA or SPD-20A UV  
183 detector, and a Bioscan  $\gamma$ -flow detector. <sup>11</sup>C-Carbon dioxide was produced via the  
184 <sup>14</sup>N(p, $\alpha$ )<sup>11</sup>C nuclear reaction with the PETtrace cyclotron (GE Medical Systems) using 16.5  
185 MeV proton irradiation of nitrogen gas containing 0.5% oxygen. Waters Classic C18 Sep-  
186 Pak cartridges were purchased from Waters Associates.

187 <sup>11</sup>C-EKAP was synthesized from the secondary amine precursor ((*S*)-**11**), which  
188 was pre-treated with CO<sub>2</sub> to provide the carbamate intermediate in the presence of cesium  
189 carbonate (Cs<sub>2</sub>CO<sub>3</sub>) and tetrabutylammonium triflate (TBAOTf) in DMF, followed by  
190 reaction with <sup>11</sup>C-MeOTf, in a procedure similar to the radiosynthesis of <sup>11</sup>C-GR103545  
191 (*I*).

192

### 193 2.2 Pre-treatment of the precursor ((*S*)-**11**)

194 To the solution of compound (*S*)-**11** (1 mg) in anhydrous DMF (0.3 mL) were added  
195 TBAOTf (2.0 mg) and Cs<sub>2</sub>CO<sub>3</sub> (2.0 mg). The mixture was sonicated for 1 min and bubbled

196 with CO<sub>2</sub> at 25 mL/min for 5 min. This CO<sub>2</sub> pre-treated solution of the precursor in DMF  
197 is ready to use.

198

### 199 2.3 Radiosynthesis of <sup>11</sup>C-EKAP

200 The cyclotron produced <sup>11</sup>C-CO<sub>2</sub> was reacted with hydrogen at 400 °C under a  
201 nickel catalyst to afford <sup>11</sup>C-CH<sub>4</sub>, which was converted to <sup>11</sup>C-CH<sub>3</sub>I by a gas phase reaction  
202 with iodine (2). <sup>11</sup>C-CH<sub>3</sub>I was swept through the silver triflate column at 190 °C in an FxC  
203 module (3, 4) and the resulting <sup>11</sup>C-CH<sub>3</sub>OTf was bubbled into the CO<sub>2</sub> pre-treated solution  
204 of the precursor in DMF until activity peaked. The reaction mixture was heated at 45 °C  
205 for 5 min, cooled to room temperature, diluted with 1.5 mL of 0.1 M ammonium formate  
206 solution and injected onto the semi-preparative HPLC column (Gemini C18, 10 μm, 10 ×  
207 250 mm). The column was eluted with a mobile phase of 37% MeCN and 63% 0.1 M  
208 ammonium formate solution at a flow rate of 5 mL/min. The radioactivity fraction eluting  
209 between 11-12 min was collected, diluted with 50 mL of DI water containing 400 mg of  
210 United States Pharmacopeia (USP) grade ascorbic acid, and loaded onto a Waters Classic  
211 C18 SepPak cartridge. The SepPak was rinsed with 10 mL of 1 mM HCl and dried, then  
212 eluted with 1 mL of USP absolute ethanol (Pharmco-AAPER) followed by a solution of 3  
213 mg of USP ascorbic acid in 3 mL of USP saline (American Regent). The resulting solution  
214 was passed through a sterile 0.22 μm membrane filter (13 mm, Millipore MILLEX GV)  
215 into a sterile dose vial containing a mixture of 7 mL USP saline, 7 mg of USP ascorbic acid  
216 and 200 μL of 4.2% USP NaHCO<sub>3</sub> (Abraxis). The inactive (*S*)-enantiomer was synthesized  
217 in similar procedures.

218

### 219 3. Plasma metabolite analysis and input function measurement

220

#### 221 3.1 Method

222 Arterial blood samples were collected at preselected time points and assayed for  
223 radioactivity in whole blood and plasma with gamma counters (Wizard 1480/2480, Perkin  
224 Elmer, Waltham, MA, USA). Six samples, drawn at 0, 5, 15, 30, 60 and 90 min, were  
225 processed and analyzed to measure the radiotracer metabolite profile by HPLC using the  
226 column-switching method (5). Whole blood samples in EDTA tubes were centrifuged at  
227 2,930 g at 4 °C for 5 min to separate the plasma. Supernatant plasma was collected and  
228 activity in 0.2 mL aliquots was counted on a gamma counter. Plasma samples were then  
229 mixed with urea (8 M) to denature plasma proteins, filtered through a 1.0 µm Whatman 13  
230 mm CD/X syringe filter and loaded onto an automatic column-switching HPLC system  
231 connecting a capture column (4.6 × 19 mm) self-packed with Phenomenex Strata-X  
232 polymeric SPE sorbent and eluting with 1% MeCN in water at 2 mL/min for 4 min. The  
233 trapped activity in the capture column was then back flushed and eluted through a  
234 Phenomenex Luna C18 phenyl hexyl analytical column (4.6 × 250 mm, 5 µm) with 45%  
235 MeCN in 0.1 M ammonium formate (pH = 6.4) at a flow rate of 1.8 mL/min. The eluent  
236 fractions were collected with an automated fraction collector (Spectrum Chromatography  
237 CF-1). Activity in the whole blood, plasma, filtered plasma-urea mix, filter, and HPLC  
238 eluent fractions was all counted with the automatic  $\gamma$  counters. The sample recovery rate,  
239 extraction efficiency, and HPLC fraction recovery were monitored. The un-metabolized

240 parent fraction was determined as the ratio of the sum of radioactivity in fractions  
241 containing the parent compound to the total amount of radioactivity collected and fitted  
242 with inverted gamma function and corrected for filtration efficiency. The arterial input  
243 function (AIF) was then calculated as the product of the total counts in the plasma and the  
244 interpolated parent fraction at each time point.

245

### 246 3.2 Metabolite analysis results

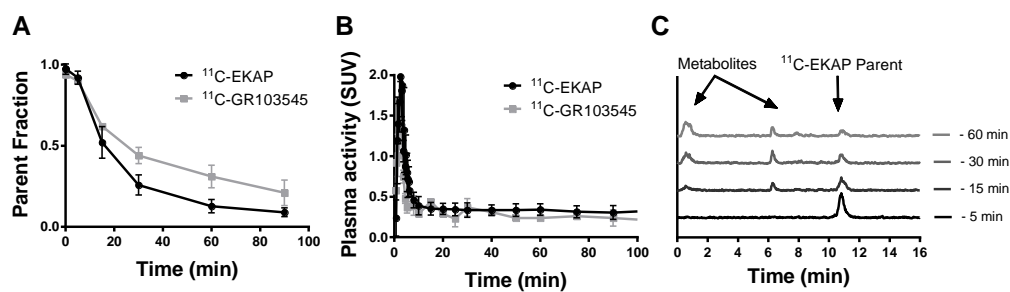

247

248 SUPPLEMENTAL FIGURE 1. Parent fraction in plasma (A) and metabolite-corrected  
249 plasma activity over time (B) for  $^{11}\text{C}$ -EKAP and  $^{11}\text{C}$ -GR103545, and HPLC  
250 chromatograms from metabolite analysis of  $^{11}\text{C}$ -EKAP (C).

251

## 252 4. Time activity curve (TAC) analysis and kinetic modeling

253

### 254 4.1 General information

255 High-resolution magnetic resonance (MR) images were acquired with a Siemens  
256 3T Trio scanner to assist with image co-registration and anatomical localization of regions

257 of interest (ROIs). The MR image was registered to an atlas and to the PET images, as  
258 previously described (6).

259 PET emission data were attenuation-corrected using the transmission scan, and  
260 dynamic images were reconstructed using a Fourier rebinning and filtered back projection  
261 algorithm. Using the MR images, and the following ROIs were defined: amygdala, brain  
262 stem, caudate nucleus, cerebellum, cingulate cortex, frontal cortex, globus pallidus,  
263 hippocampus, insula, nucleus accumbens, occipital cortex, pons, putamen, substantia nigra,  
264 temporal cortex and thalamus. For each PET scan, radiotracer concentrations over time, i.e.  
265 time-activity curves (TACs) were generated for the ROIs. Tissue to metabolite-corrected  
266 plasma activity ratio over time was calculated for the cingulate cortex, temporal cortex and  
267 cerebellum regions to project the radiotracer equilibration approaching time.

268 Regional TACs were fitted and analyzed with the one-tissue and two-tissue  
269 compartment (1TC, 2TC) models (7), as well as the multilinear analysis (MA1) method  
270 with a starting time ( $t^*$ ) of 30 min (8). Regional distribution volume ( $V_T$ , mL/cm<sup>3</sup>) was  
271 calculated from kinetic analysis of regional TACs using the metabolite-corrected arterial  
272 plasma concentration as the input function (9). Akaike information criterion (AIC) (10)  
273 and visual assessment of fitting curves were used to evaluate the goodness-of-fits.

274

275 4.2 Dose-dependent blocking scans

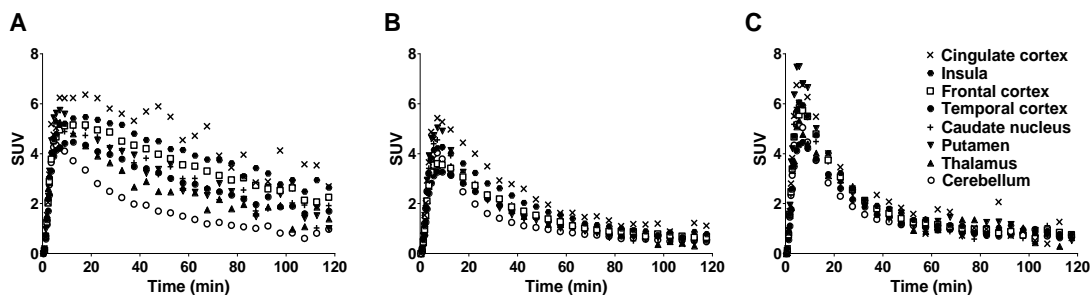

276

277 SUPPLEMENTAL FIGURE 2. Regional TACs of <sup>11</sup>C-EKAP in a baseline scan (A) and

278 blocking scans with the KOR selective antagonist LY2456302 at a dose of 0.05 mg/kg

279 (B) and 0.3 mg/kg (C), showing dose-dependent blockade of <sup>11</sup>C-EKAP binding.

280

281 4.3 Goodness-of-fits of kinetic models

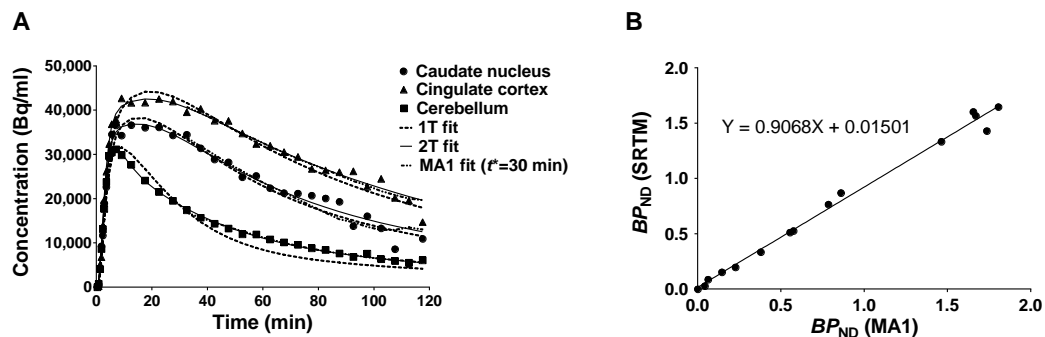

282

283 SUPPLEMENTAL FIGURE 3. Comparison of curve fitting with the 1TC, 2TC models

284 and MA1 ( $t^* = 30$  min) method in selected brain regions (A); and correlation of regional

285  $BP_{ND}$  values derived with the SRTM and MA1 models (B).

286 **REFERENCES**

287

288 **1.** Nabulsi NB, Zheng MQ, Ropchan J, et al. [<sup>11</sup>C]GR103545: novel one-pot  
289 radiosynthesis with high specific activity. *Nucl Med Biol.* 2011;38:215-221.

290

291 **2.** Larsen P, Ulin J, Dahlstrom K, Jensen M. Synthesis of [C-11]iodomethane by  
292 iodination of [C-11]methane. *Appl Radiat Isotopes.* 1997;48:153-157.

293

294 **3.** Jewett DM. A simple synthesis of [<sup>11</sup>C]methyl triflate. *Int J Rad Appl Instrum A.*  
295 1992;43:1383-1385.

296

297 **4.** Nabulsi N, Huang Y, Weinzimmer D, et al. High-resolution imaging of brain 5-HT  
298 1B receptors in the rhesus monkey using [<sup>11</sup>C]P943. *Nucl Med Biol.* 2010;37:205-214.

299

300 **5.** Hilton J, Yokoi F, Dannals RF, Ravert HT, Szabo Z, Wong DF. Column-switching  
301 HPLC for the analysis of plasma in PET imaging studies. *Nucl Med Biol.* 2000;27:627-630.

302

303 **6.** Sandiego CM, Weinzimmer D, Carson RE. Optimization of PET-MR registrations  
304 for nonhuman primates using mutual information measures: A Multi-Transform Method  
305 (MTM). *Neuroimage.* 2013;64:571-581.

306

307 **7.** Gunn RN, Gunn SR, Cunningham VJ. Positron emission tomography  
308 compartmental models. *J Cereb Blood Flow Metab.* 2001;21:635-652.

309

310 **8.** Ichise M, Toyama H, Innis RB, Carson RE. Strategies to improve neuroreceptor  
311 parameter estimation by linear regression analysis. *J Cereb Blood Flow Metab.*  
312 2002;22:1271-1281.

313

314 **9.** Innis RB, Cunningham VJ, Delforge J, et al. Consensus nomenclature for in vivo  
315 imaging of reversibly binding radioligands. *J Cereb Blood Flow Metab.* 2007;27:1533-  
316 1539.

317

318 **10.** Akaike H. New Look at Statistical-Model Identification. *IEEE Trans Autom*  
319 *Control.* 1974;Ac19:716-723.

320

321
